# Supplementary material for: Evaluation of Measured Resting Metabolic Rate for Dietary Prescription in Ageing Adults with Overweight and Adiposity-Based Chronic Disease
Source: PubMed Central journal article supplement (PMC8068182; doi:10.3390/nu13041229), 2021-04-08
Supplement: nutrients-13-01229-s001.pdf [file nutrients-13-01229-s001.pdf]

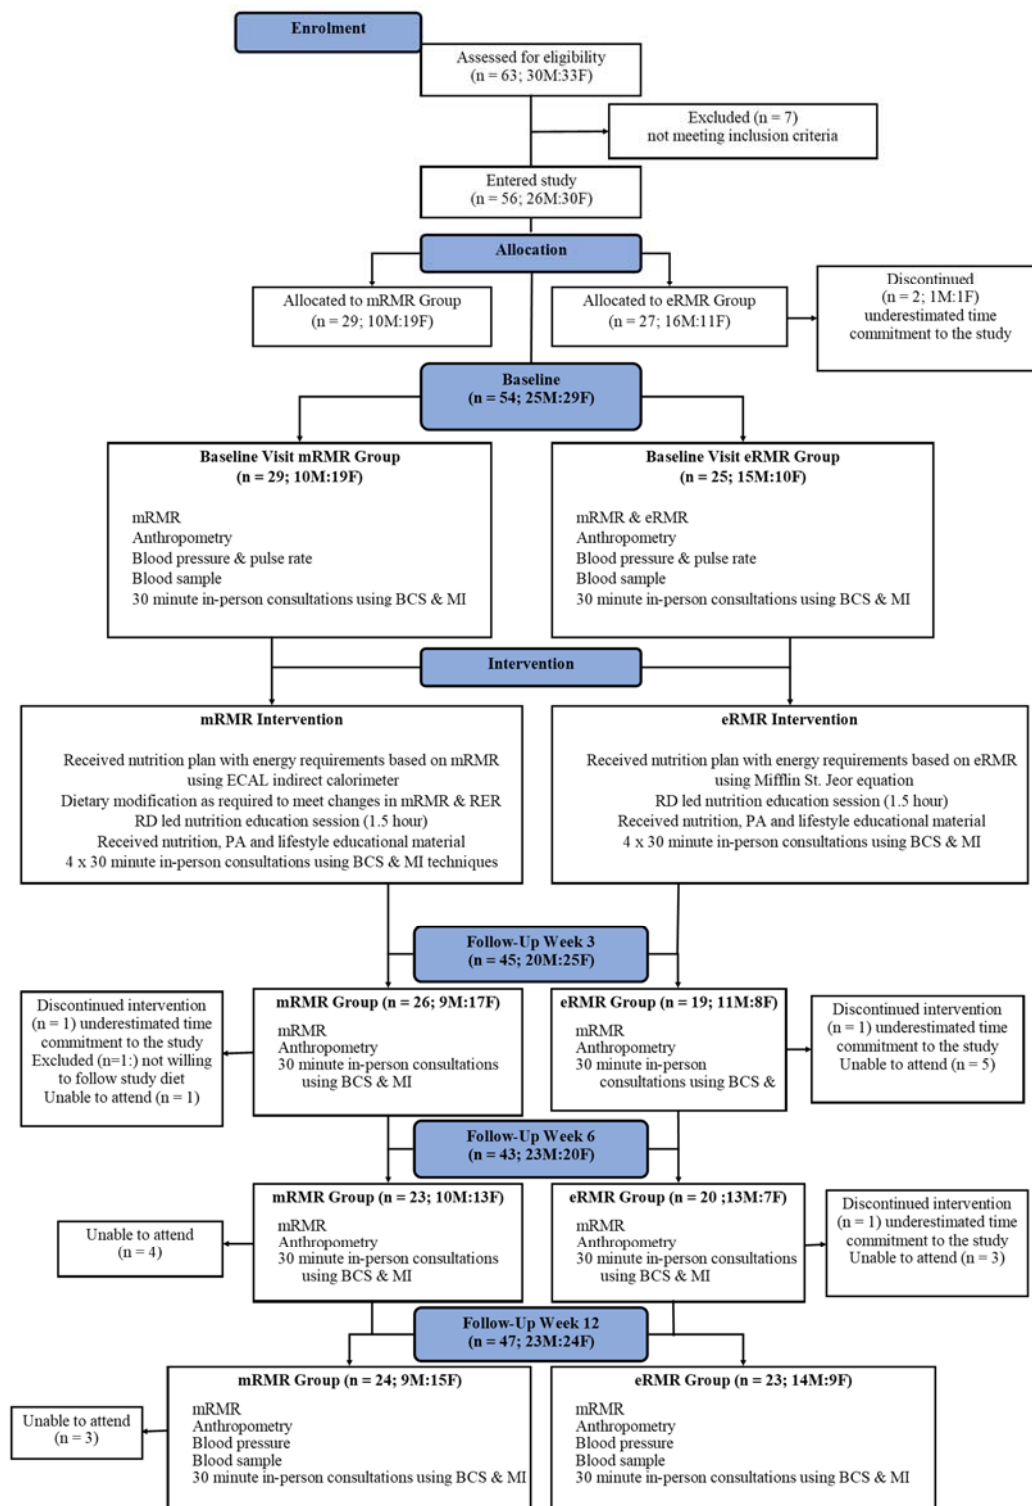

**Online Resource 1.** Participant and study flow diagram

Ciara Cooney <sup>1</sup>, Lisa Ryan <sup>1,\*</sup>, Maria McDonagh <sup>1</sup>

<sup>1</sup> Department of Natural Sciences, School of Science and Computing, Galway-Mayo Institute of Technology, Galway, Ireland; [ciara.cooney@gmit.ie](mailto:ciara.cooney@gmit.ie), [lisa.ryan@gmit.ie](mailto:lisa.ryan@gmit.ie), [Maria.McDonagh@gmit.ie](mailto:Maria.McDonagh@gmit.ie)

\* Correspondence: Lisa Ryan, Head of Department of Natural Sciences, School of Science and Computing, Galway-Mayo Institute of Technology, Dublin Road, Galway, Ireland; [lisa.ryan@gmit.ie](mailto:lisa.ryan@gmit.ie); Tel.: +353 (0)91 742556
